# Supplementary material for: Nitrogen Self-Doped Metal Free Catalysts Derived from Chitin via One Step Method for Efficient Electrocatalytic CO2 Reduction to CO
Source: MDPI journal article supplement (doi:10.3390/catal13050904), 2023-05-18
Supplement: s1 [file s1]

## Supplemental Information

# Nitrogen Self-Doped Metal Free Catalysts Derived from Chitin via One Step Method for Efficient Electrocatalytic CO<sub>2</sub> Reduction to CO

Peixu Sun <sup>1,2</sup>, Xiaoxiao Wang <sup>1,2</sup>, Mingjian Zhu <sup>1,2</sup>, Naveed Ahmad <sup>1,2</sup>, Kai Zhang <sup>1,2</sup>  
and Xia Xu <sup>1,2,\*</sup>

<sup>1</sup> School of Chemistry and Chemical Engineering, Anhui University of Technology, Ma'anshan 243002, China

<sup>2</sup> Biochemical Engineering Research Center, Anhui University of Technology, Ma'anshan 243002, China

\* Correspondence: xiax@hotmail.com

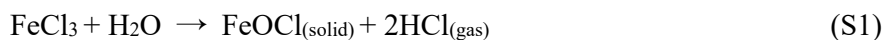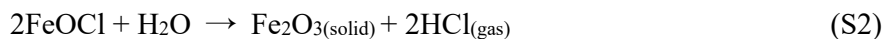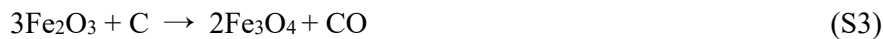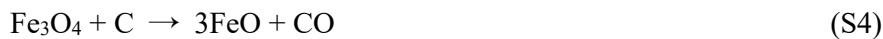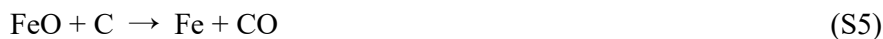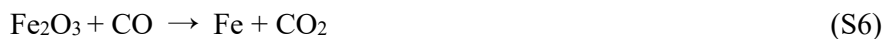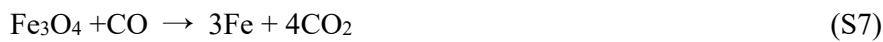

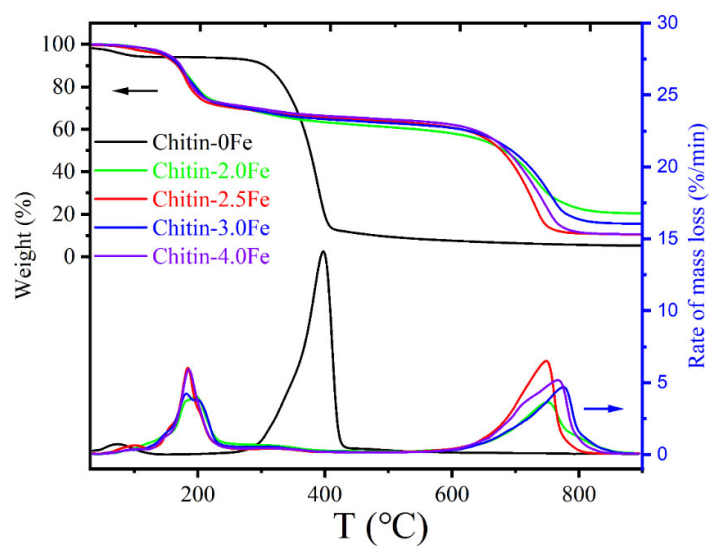

Figure S1. TGA of chitin derived catalysts prepared at different ratios of Chitin to  $\text{FeCl}_3$

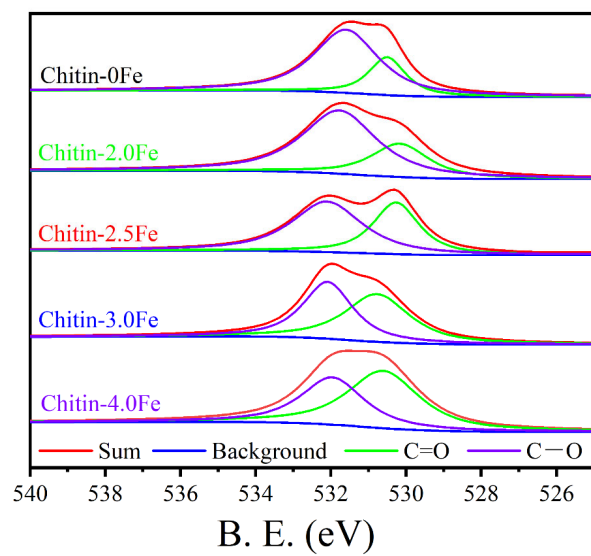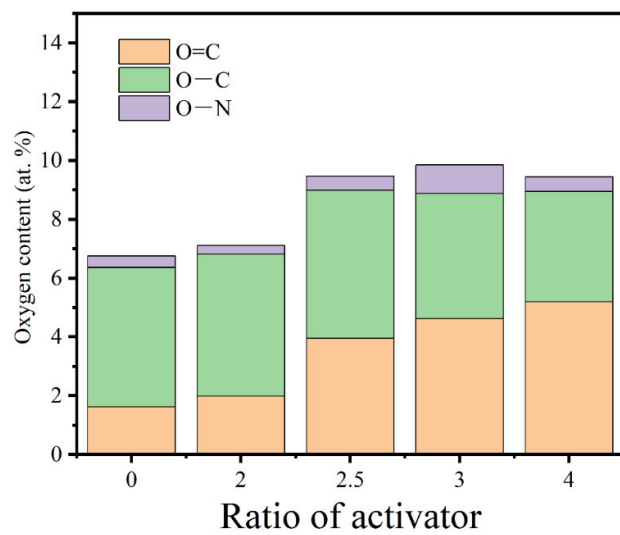

Figure S2. Oxygen content of chitin derived catalysts prepared at different ratios of Chitin to  $\text{FeCl}_3$

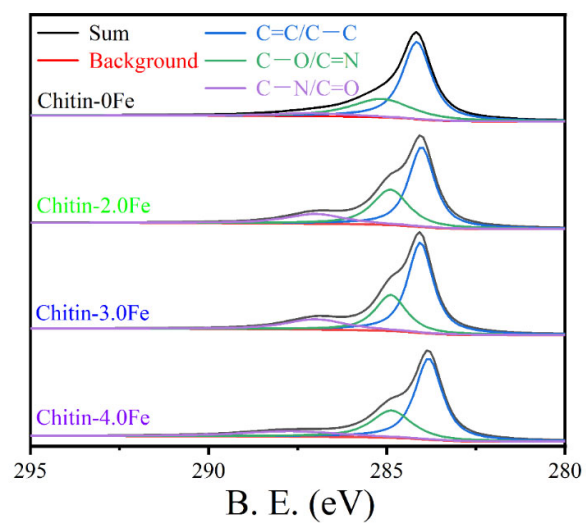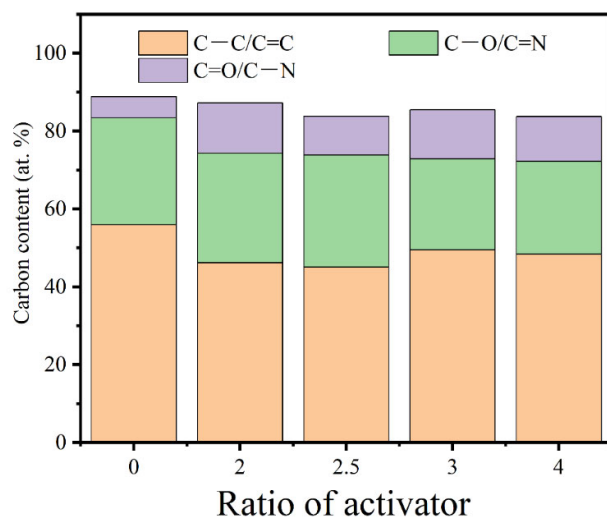

Figure S3. Carbon content of chitin derived catalysts prepared at different ratios of Chitin to FeCl<sub>3</sub>

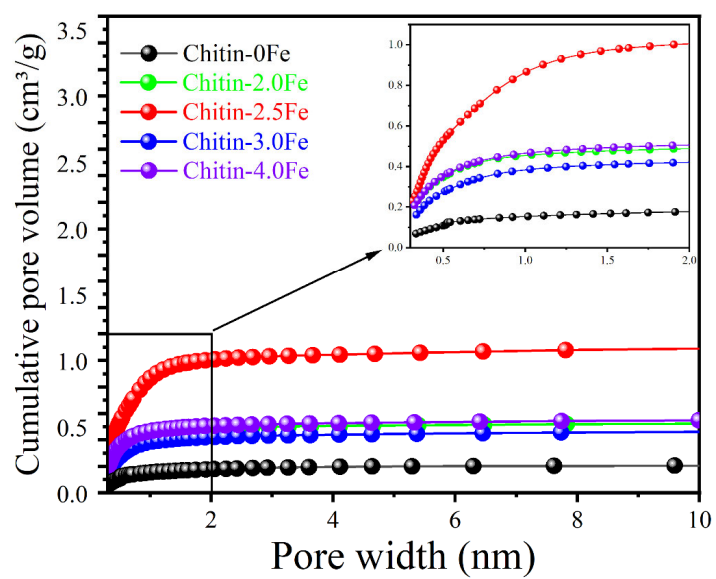

Figure S4. Cumulative pore volume of chitin derived catalysts prepared at different ratios of Chitin to  $\text{FeCl}_3$

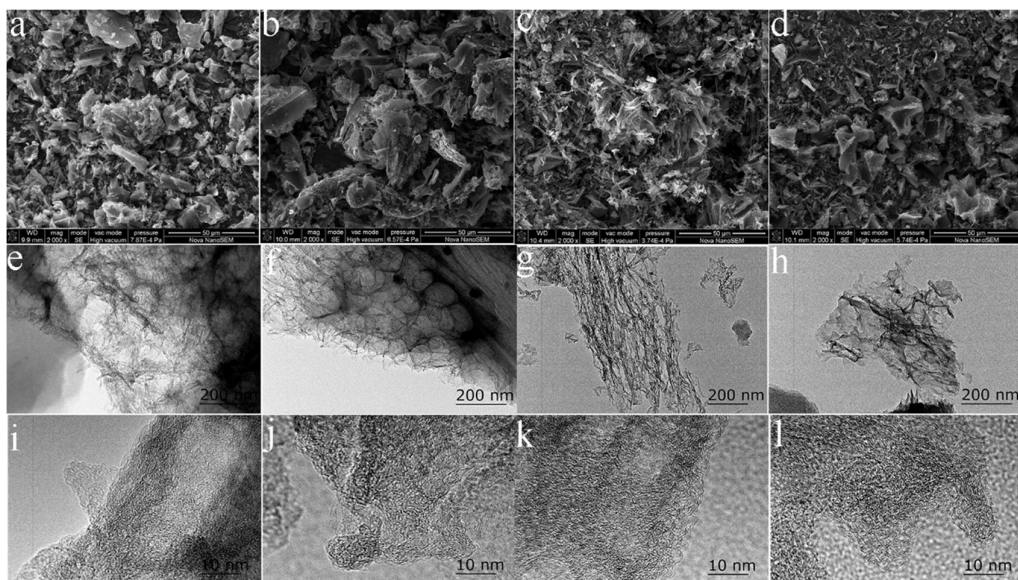

Figure S5. Morphology of chitin derived catalysts prepared at different temperatures of 700-1000 °C

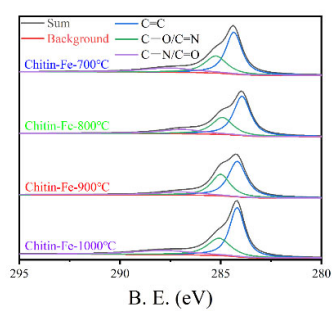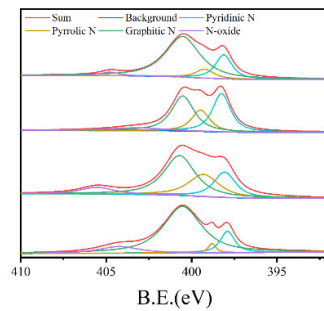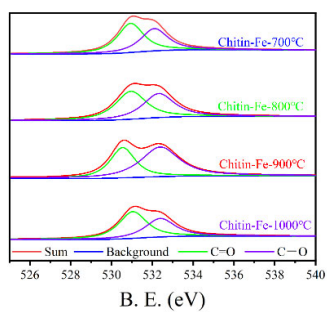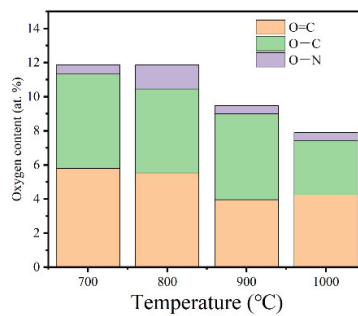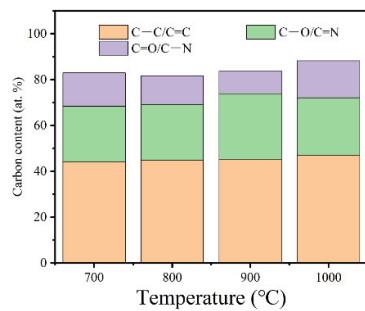

Figure S6. XPS analysis of chitin derived catalysts prepared at different temperatures of 700-1000 °C

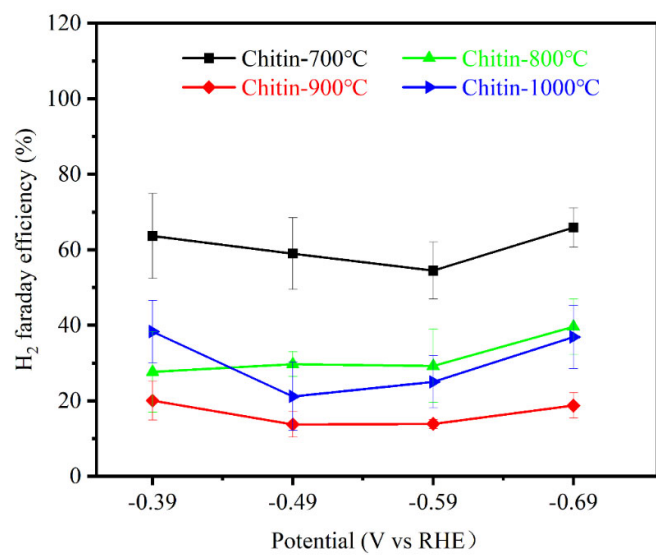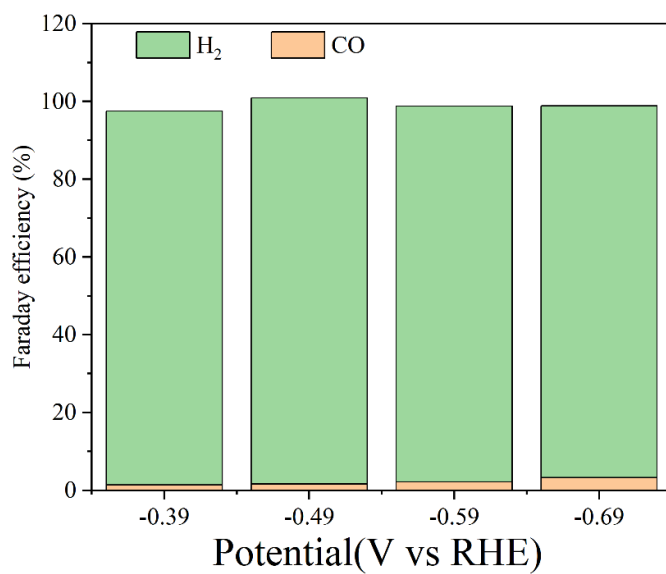

Figure S7. FE of catalysts. top: FE<sub>H<sub>2</sub></sub> of chitin derived catalysts prepared at different temperatures of 700-1000 °C. bottom: FE<sub>CO</sub> and FE<sub>H<sub>2</sub></sub> of a carbon plate without coating



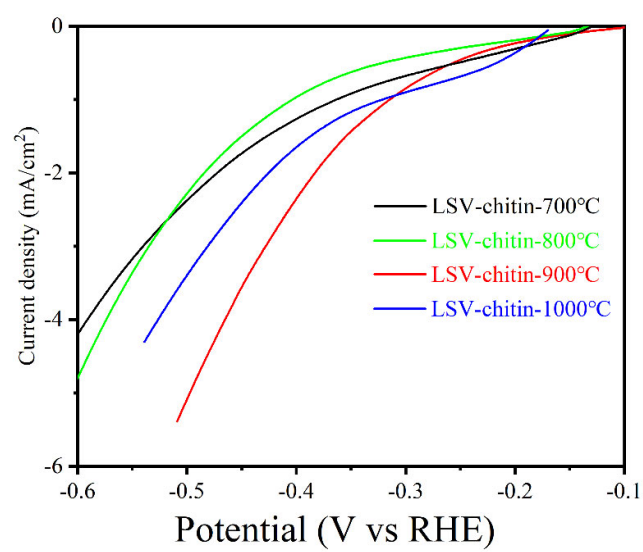

Figure S8. LSV of chitin derived catalysts prepared at different temperatures of 700-1000 °C

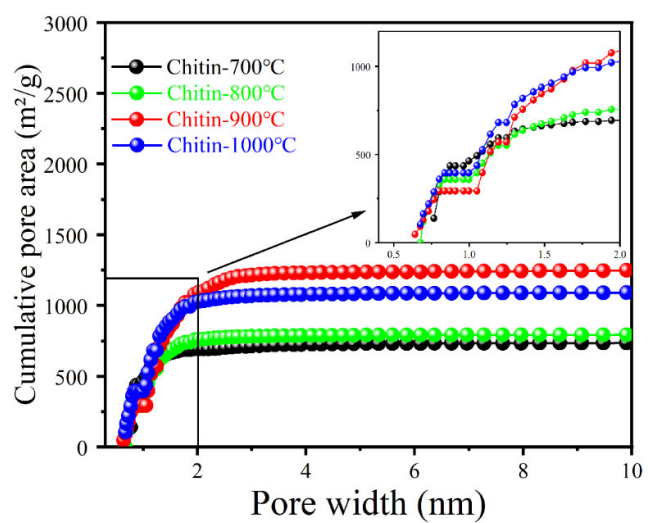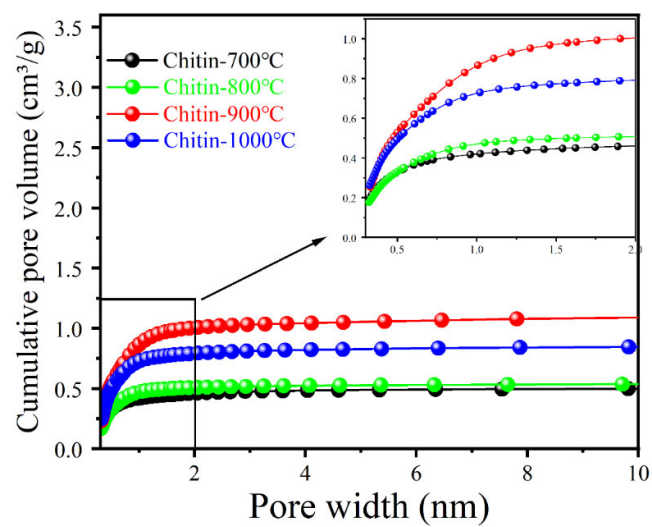

Figure S9. BET analysis of incremental pore volume and surface area for N<sub>2</sub> adsorption at 273 K
